# Supplementary material for: The Right Hemisphere Is Responsible for the Greatest Differences in Human Brain Response to High-Arousing Emotional versus Neutral Stimuli: A MEG Study
Source: MDPI journal article supplement (doi:10.3390/brainsci11080960), 2021-07-21
Supplement: s1 [file s1]

## 1. Details of Stimuli

**Table S1:** Numbers and descriptions of IAPS pictures used in this experiment

| Block one |               |                  |           |                |                  |
|-----------|---------------|------------------|-----------|----------------|------------------|
| Slide No. | Description   | Emotion Category | Slide No. | Description    | Emotion Category |
| 2480      | Elderly man   | Neutral          | 2160      | Father         | Pleasant         |
| 2170      | Mother        | Pleasant         | 2850      | Tourist        | Neutral          |
| 6260      | Aimed gun     | Unpleasant       | 6510      | Attack         | Unpleasant       |
| 3102      | Burn victim   | Unpleasant       | 4658      | Erotic couple  | Pleasant         |
| 7235      | Chair         | Neutral          | 1050      | Snake          | Unpleasant       |
| 2311      | Mother        | Pleasant         | 7020      | Fan            | Neutral          |
| 2570      | Man           | Neutral          | 6540      | Attack         | Unpleasant       |
| 4670      | Erotic couple | Pleasant         | 7080      | Fork           | Neutral          |
| 3130      | Mutilation    | Unpleasant       | 2080      | Babies         | Pleasant         |
| 3060      | Mutilation    | Unpleasant       | 1930      | Shark          | Unpleasant       |
| 9070      | Boy           | Neutral          | 2340      | Family         | Pleasant         |
| 2360      | Family        | Pleasant         | 2210      | Neutral face   | Neutral          |
| 3051      | Mutilation    | Unpleasant       | 3530      | Attack         | Unpleasant       |
| 4652      | Erotic couple | Pleasant         | 4650      | Erotic couple  | Pleasant         |
| 7010      | Basket        | Neutral          | 2440      | Neutral girl   | Neutral          |
| 3110      | Burn victim   | Unpleasant       | 4660      | Erotic couple  | Pleasant         |
| 2050      | Baby          | Pleasant         | 6350      | Attack         | Unpleasant       |
| 7040      | Dust pan      | Neutral          | 2381      | Girl           | Neutral          |
| 2165      | Father        | Pleasant         | 4659      | Erotic couple  | Pleasant         |
| 1201      | Spider        | Unpleasant       | 1120      | Snake          | Unpleasant       |
| 7009      | Mug           | Neutral          | 7175      | Lamp           | Neutral          |
| 7233      | Plate         | Neutral          | 9405      | Sliced hand    | Unpleasant       |
| 4651      | Erotic couple | Pleasant         | 2200      | Neutral face   | Neutral          |
| 3071      | Mutilation    | Unpleasant       | 4664      | Erotic couple  | Pleasant         |
| 2230      | Neutral face  | Neutral          | 2190      | Man            | Neutral          |
| 2341      | Children      | Pleasant         | 3080      | Mutilation     | Unpleasant       |
| 1300      | Pit bull      | Unpleasant       | 4680      | Erotic couple  | Pleasant         |
| 3000      | Mutilation    | Unpleasant       | 7002      | Towel          | Neutral          |
| 7030      | Iron          | Neutral          | 2070      | Baby           | Pleasant         |
| 4690      | Erotic couple | Pleasant         | 3010      | Mutilation     | Unpleasant       |
| Block two |               |                  |           |                |                  |
| Slide No. | Description   | Emotion Category | Slide No. | Description    | Emotion Category |
| 7031      | Shoes         | Neutral          | 5300      | Galaxy         | Pleasant         |
| 3068      | Mutilation    | Unpleasant       | 2393      | Factory Worker | Neutral          |
| 7470      | Pancakes      | Pleasant         | 3225      | Mutilation     | Unpleasant       |
| 3131      | Mutilation    | Unpleasant       | 7011      | Gas can        | Neutral          |
| 5130      | Rocks         | Neutral          | 7499      | Concert        | Pleasant         |
| 8205      | Waterskiing   | Pleasant         | 3064      | Mutilation     | Unpleasant       |
| 7224      | File cabinets | Neutral          | 2446      | Boots          | Neutral          |
| 9183      | Hurt dog      | Unpleasant       | 8206      | Surfers        | Pleasant         |
| 2055      | Man in pool   | Pleasant         | 9412      | Dead man       | Unpleasant       |
| 9410      | Soldier       | Unpleasant       | 6520      | Attack         | Unpleasant       |
| 7006      | Bowl          | Neutral          | 8280      | Diver          | Pleasant         |

|      |               |            |      |               |            |
|------|---------------|------------|------|---------------|------------|
| 5994 | Skyline       | Pleasant   | 7287 | Tomato        | Neutral    |
| 2104 | Neutral Woman | Neutral    | 3015 | Accident      | Unpleasant |
| 4608 | Erotic couple | Pleasant   | 7036 | Ship yard     | Neutral    |
| 9325 | Vomit         | Unpleasant | 4612 | Couple        | Pleasant   |
| 3001 | Headless Body | Unpleasant | 6313 | Attack        | Unpleasant |
| 8300 | Pilot         | Pleasant   | 2155 | Pregnant      | Pleasant   |
| 7186 | Abstract art  | Neutral    | 2830 | Woman         | Neutral    |
| 5535 | Still life    | Neutral    | 7110 | Hammer        | Neutral    |
| 3030 | Mutilation    | Unpleasant | 8001 | Basketball    | Pleasant   |
| 7400 | Candy         | Pleasant   | 3069 | Mutilation    | Unpleasant |
| 7184 | Abstract art  | Neutral    | 2362 | Girl and dog  | Pleasant   |
| 4810 | Erotic couple | Pleasant   | 9800 | Skin head     | Unpleasant |
| 3170 | Baby tumor    | Unpleasant | 2383 | Secretary     | Neutral    |
| 2512 | Man           | Neutral    | 7491 | Building      | Neutral    |
| 9185 | Dead dog      | Unpleasant | 4687 | Erotic couple | Pleasant   |
| 8467 | Runners       | Pleasant   | 3059 | Mutilation    | Unpleasant |
| 7018 | Screw         | Neutral    | 9413 | Hanging       | Unpleasant |
| 8161 | Hang glider   | Pleasant   | 4607 | Erotic couple | Pleasant   |
| 9921 | Fire          | Unpleasant | 7038 | Shoes         | Neutral    |

### Block three

| Slide No. | Description   | Emotion Category | Slide No. | Description  | Emotion Category |
|-----------|---------------|------------------|-----------|--------------|------------------|
| 3195      | Stitches      | Unpleasant       | 9910      | Car accident | Unpleasant       |
| 7056      | Tool          | Neutral          | 2388      | Kids         | Pleasant         |
| 4610      | Romance       | Pleasant         | 2880      | Shadow       | Neutral          |
| 2102      | Neuman        | Neutral          | 9905      | Car accident | Unpleasant       |
| 4622      | Romance       | Pleasant         | 7950      | Tissue       | Neutral          |
| 9006      | HIV tattoo    | Unpleasant       | 2598      | Family       | Pleasant         |
| 7185      | Abstract art  | Neutral          | 9908      | Car accident | Unpleasant       |
| 2811      | Gun           | Unpleasant       | 7187      | Abstract art | Neutral          |
| 5820      | Mountains     | Pleasant         | 5781      | Lake         | Pleasant         |
| 6821      | Gang          | Unpleasant       | 6570      | Suicide      | Unpleasant       |
| 1590      | Horse         | Pleasant         | 2224      | Boys         | Pleasant         |
| 2516      | Elderly Woman | Neutral          | 5531      | Mushroom     | Neutral          |
| 2688      | Hunters       | Unpleasant       | 4623      | Romance      | Pleasant         |
| 8120      | Athlete       | Pleasant         | 2411      | Girl         | Neutral          |
| 2214      | Neutral man   | Neutral          | 6838      | Police       | Unpleasant       |
| 5270      | Nature        | Pleasant         | 7270      | Ice cream    | Pleasant         |
| 7059      | Key ring      | Neutral          | 7207      | Beads        | Neutral          |
| 3103      | Injury        | Unpleasant       | 2981      | Deer head    | Unpleasant       |
| 9322      | Vomit         | Unpleasant       | 7255      | Cracker      | Neutral          |
| 2890      | Twins         | Neutral          | 6250      | Aimed gun    | Unpleasant       |
| 1340      | Women         | Pleasant         | 2222      | Boys reading | Pleasant         |
| 5831      | Seagulls      | Pleasant         | 7017      | Video        | Neutral          |
| 6550      | Attack        | Unpleasant       | 7230      | Turkey       | Pleasant         |
| 2396      | Couple        | Neutral          | 6312      | Abduction    | Unpleasant       |
| 6231      | Aimed gun     | Unpleasant       | 2345      | Children     | Pleasant         |
| 2595      | Women         | Neutral          | 9420      | Soldier      | Unpleasant       |
| 4640      | Romance       | Pleasant         | 7041      | Baskets      | Neutral          |
| 7179      | Rug           | Neutral          | 2377      | Reading      | Neutral          |
| 8080      | Sailing       | Pleasant         | 8180      | Cliff divers | Pleasant         |
| 9428      | Assault       | Unpleasant       | 3500      | Attack       | Unpleasant       |

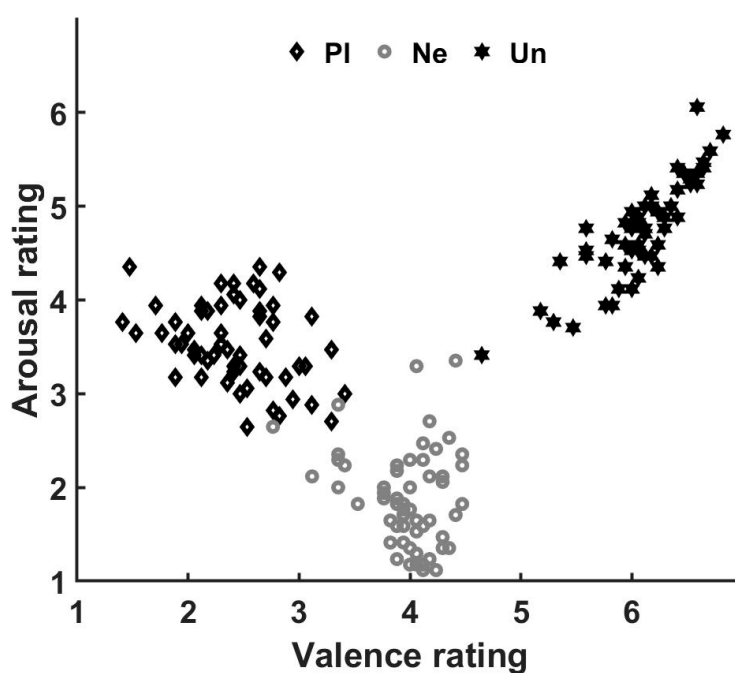

**Figure S1.** Assessing the stimuli [13]. Arousal and valence levels for each picture category. The plot shows the mean ratings of all participants for the arousal and valence levels of pictures shown in each category of pleasant (Pl, black diamond), unpleasant (Un, black hexagram), and neutral (Ne, gray circles). The X-axis denotes the valence levels (1 to 7, pleasant to unpleasant), and the Y-axis shows the arousal levels (1 to 7, relaxed to excited). Comparing mean ratings of subjects for each picture category using t-test, unpleasant pictures were rated as having the highest arousal level (compared to either pleasant or neutral,  $p < 0.001$ ) and pleasant pictures had higher arousal levels than neutral pictures ( $p < 0.001$ ). Pleasant pictures were rated as having the lowest valence level (compared to either unpleasant or neutral,  $p < 0.001$ ).

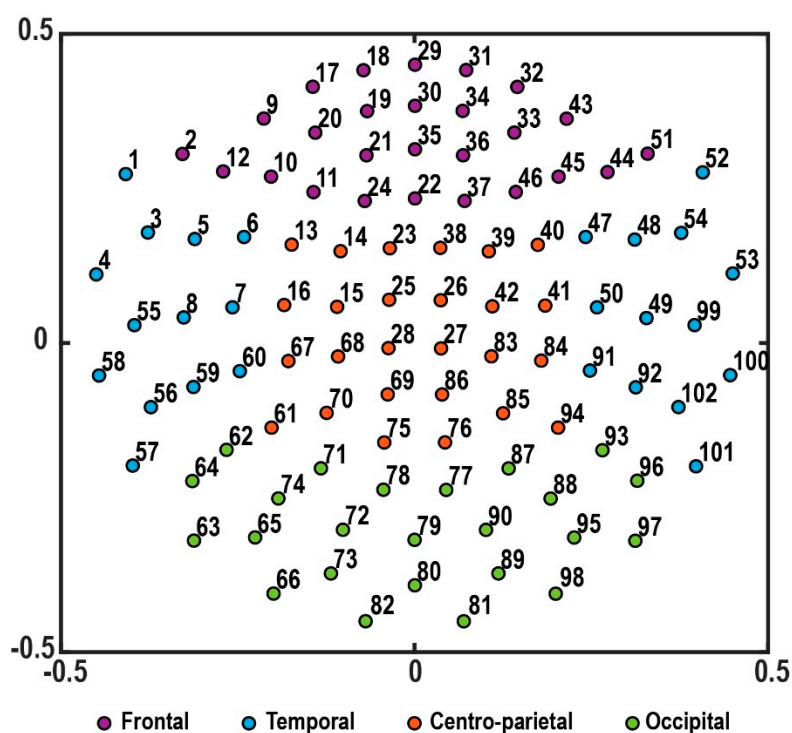

**Figure S2.** Distribution and numbering system of magnetometers across the scalp in Electa Neuromag Vectorview MEG system and associated brain regions.
